# Supplementary material
Source: PubMed Central journal article supplement (PMC7606834)
Supplement: NIHMS1631568-supplement-Supp_info.pdf [file NIHMS1631568-supplement-Supp_info.pdf]

## **Supplementary Materials**

**STING controls intestinal homeostasis through promoting antimicrobial peptide  
expression in epithelial cells**

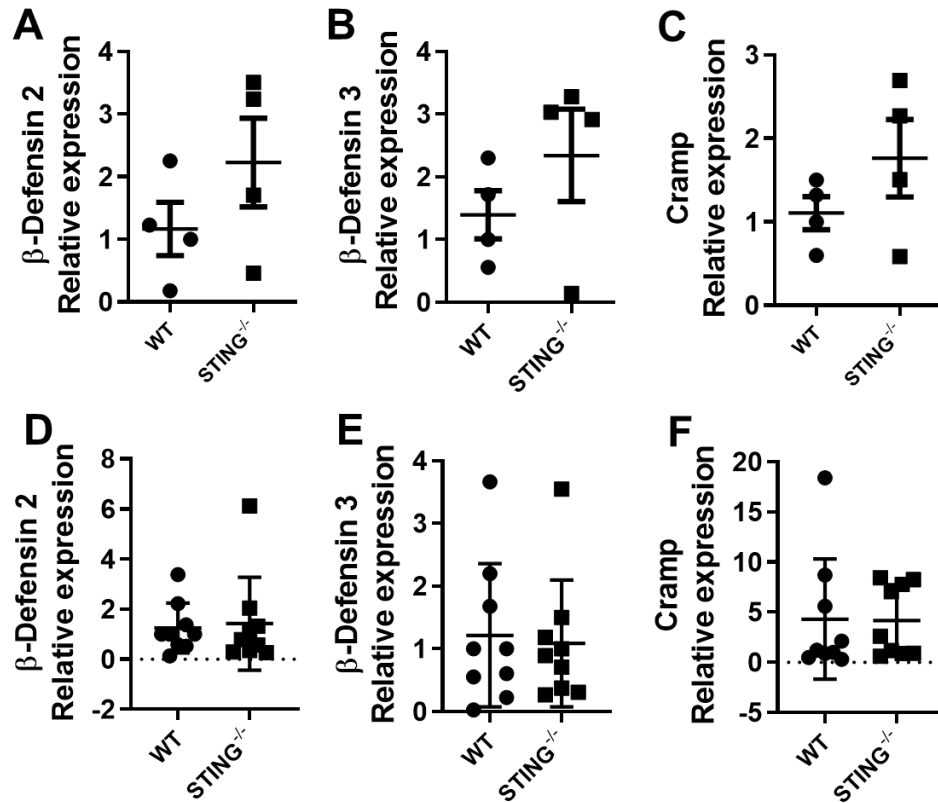

**Supplementary Fig. 1** STING<sup>-/-</sup> IECs show similar levels of  $\beta$ -defensins and Cramp compared with WT IECs. (A-C) IECs were isolated from WT and STING<sup>-/-</sup> mice (n = 4/group) under steady conditions. The expression of  $\beta$ -defensin-2, -3, and Cramp was evaluated by qRT-PCR and normalized against GAPDH. (D-F) WT (n = 9) and STING<sup>-/-</sup> mice (n = 9) were infected with *Citrobacter rodentium* by oral gavage. Primary IECs were isolated 10 days post infection. The expression of  $\beta$ -defensin-2, -3, and Cramp was determined by qRT-PCR and normalized against GAPDH. Data are represented as means  $\pm$  standard deviation. One representative of 2-3 experiments with similar results was shown.

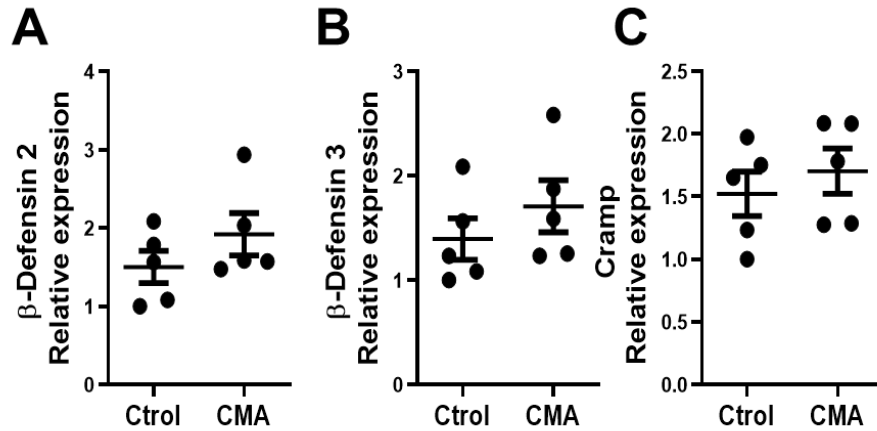

**Supplementary Fig. 2 STING agonist does not affect  $\beta$ -defensins and Cramp expression in IECs.** MSIE cells (n = 5/group) were treated with or without 50  $\mu$ g/ml CMA for 24 hrs. The expression of  $\beta$ -defensin-2, -3, and Cramp was also evaluated by qRT-PCR and normalized against GAPDH. Data are represented as means  $\pm$  standard deviation. One representative of 3 experiments with similar results was shown.

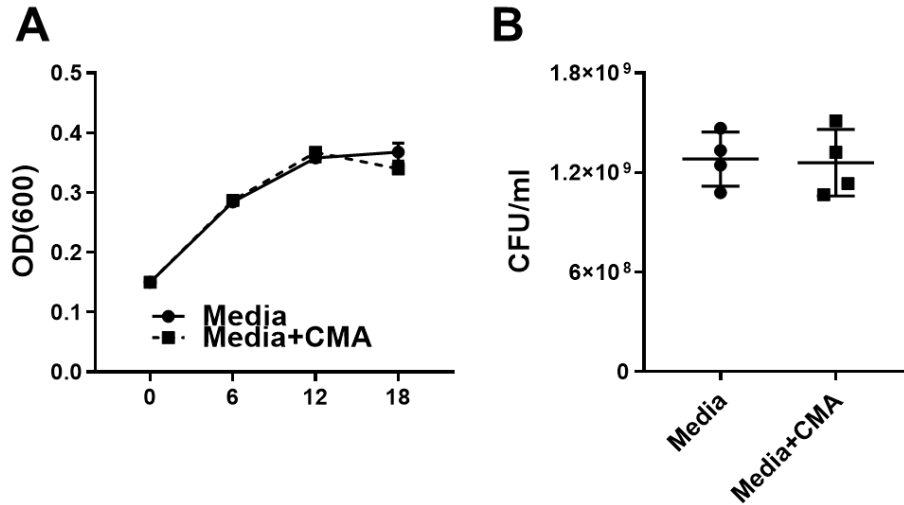

**Supplementary Fig. 3 CMA alone does not affect *Citrobacter rodentium* growth.** *Citrobacter rodentium* were treated with or without CMA (50  $\mu$ g/ml) for 24 hrs. (A) The OD values (600 nm) were measured at different time points. (B) Bacterial culture suspensions were added to solid culture plates for colony counting overnight after treated with the extracts of IEC with the extracts of IEC at 6 hours. Data are represented as means  $\pm$  standard deviation. One representative of 3 experiments with similar results was shown.

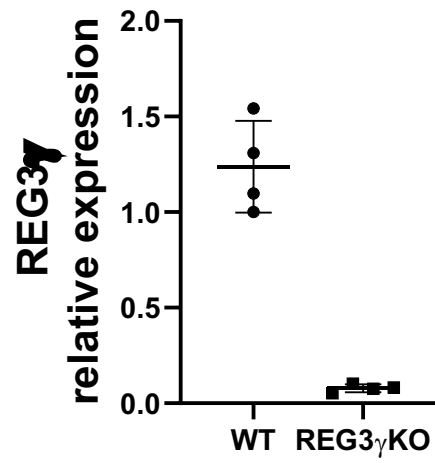

**Supplementary Fig. 4. The efficiency of knockout of REG3 $\gamma$  Using CRISPR.** WT and REG3 $\gamma$ KO MSIE cells (n = 4) were collected for analysis of REG3 $\gamma$  expression using qRT-PCR.

**Supplementary Table 1. PCR Primers and CRISPR-Guide RNA Oligo Sequences**

| PCR primers                      |         |                                  |
|----------------------------------|---------|----------------------------------|
| mGAPDH                           | Forward | 5'-TCAACAGCAACTCCCACTCTTCCA-3'   |
|                                  | Reverse | 5'-ACCCTGTTGCTGTAGCCGTATTCA-3'   |
| mREGIII $\beta$                  | Forward | 5'-TCCCAGGCTTATGGCTCCTA-3'       |
|                                  | Reverse | 5'-GCAGGCCAGTTCTGCATCA-3'        |
| m $\beta$ -defensin-2            | Forward | 5'-AAGTATTGGATACGAAGCAG-3'       |
|                                  | Reverse | 5'TGGCAGAAGGAGGACAAATG-3'        |
| m $\beta$ -defensin-3            | Forward | 5'- AAAGGAGGCAGATGCTGGAA-3'      |
|                                  | Reverse | 5'- ACGGGATCTTGGTCTTCTCT-3'      |
| mCRAMP                           | Forward | 5'-CAGCCCTTTCGGTTCAAGAA-3'       |
|                                  | Reverse | 5'-CCCACCTTTGCGGAGAAGT-3'        |
| mHK2                             | Forward | 5'-TGATCGCCTGCTTATTCACGG-3'      |
|                                  | Reverse | 5'- AACCGCCTAGAAATCTCCAGA-3'     |
| mLDHA                            | Forward | 5'- TGTCTCCAGGAAAGACTACTGT-3'    |
|                                  | Reverse | 5'- GACTGTACTTGACAATGTTGGGA-3'   |
| mPDK                             | Forward | 5'-GGACTTCGGGTCAGTGAATGC-3'      |
|                                  | Reverse | 5'-TCCTGAGAAGATTGTCGGGGA-3'      |
| CRISPR-guide RNA oligo sequences |         |                                  |
| STAT3                            | Forward | 5'-CACCGCGATTACCTGCACTCGCTTC-3'  |
|                                  | Reverse | 5'-AAACGAAGCGAGTGCAGGTAATCGC-3'  |
| mREG3 $\gamma$                   | Forward | 5'-CACCGTAGGGCTATGAACCCAACAG-3'  |
|                                  | Reverse | 5'-AAACCTGTTGGGTTTCATAGCCCTAC-3' |

PCR, polymerase chain reaction.
